# Supplementary material
Source: Springer Nature journal article supplement (https://www.springermedizin.de/resource/supplementary/12891_2003_68_MOESM1_ESM.pdf/9510500)

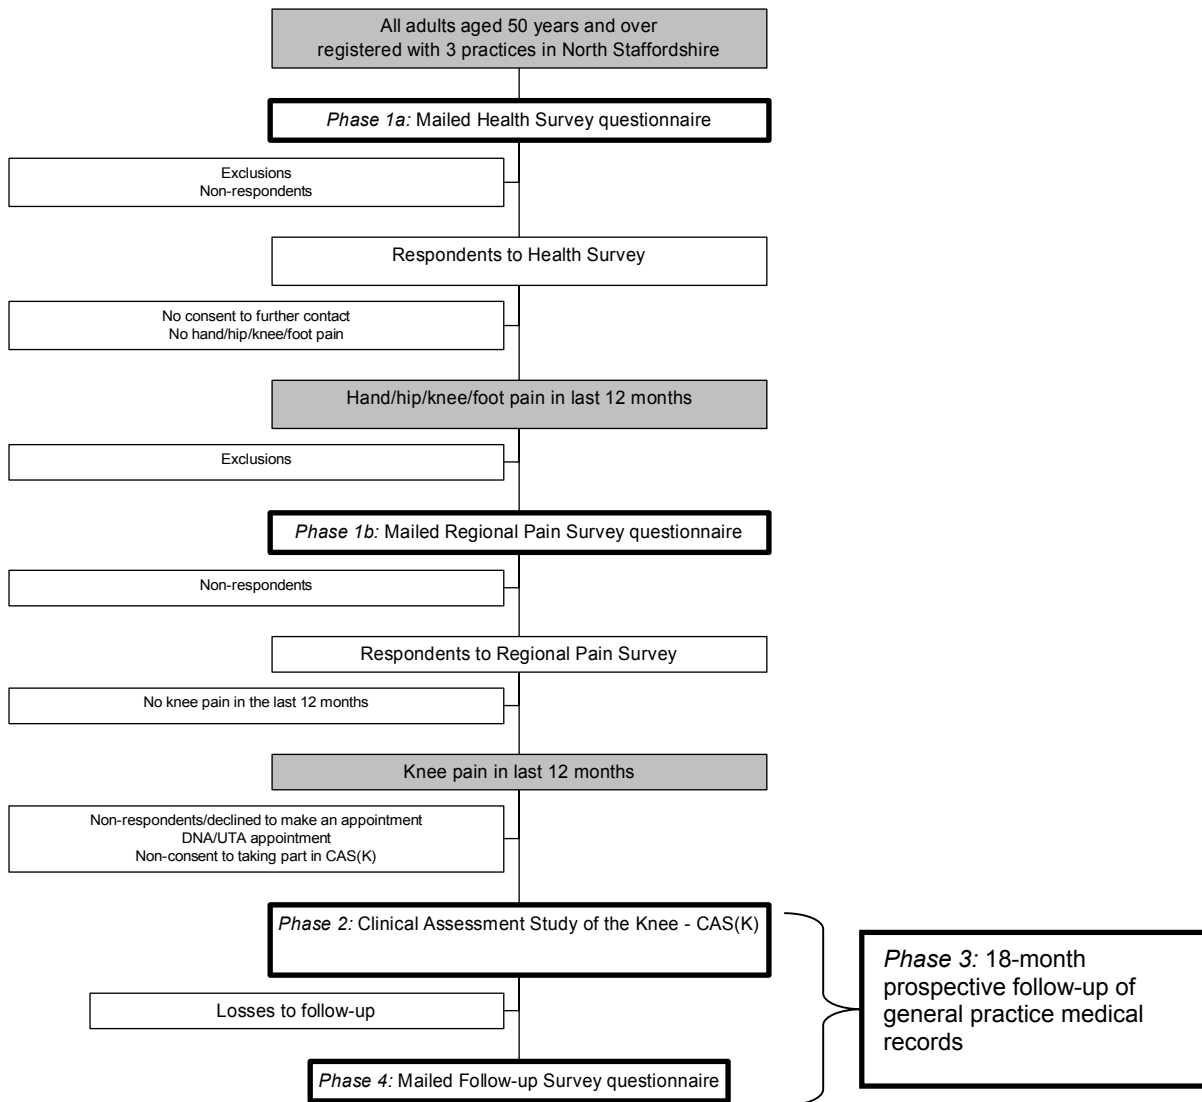

Data collection points are in bold

Supplement: MOESM1 [file 9510500]
